# Supplementary material
Source: Elsevier journal article supplement (https://www.sciencedirect.com/science/article/pii/S2605073020300031)
Supplement: mmc1 [file S2605073020300031:mmc1.docx]

Figura 1. a) Imagen de ecografía en la que se visualiza una lesión inguinal derecha de morfología fusiforme y bordes bien definidos, de aspecto sólido con pequeñas áreas quísticas en su interior y con escasa vascularización en el estudio Doppler color.

b) Imagen de RM potenciada en T1 en la que se confirma la presencia de un nódulo sólido (asterisco) en el interior del conducto inguinal, que presenta pequeñas zonas espontáneamente hiperintensas (flecha), que sugieren presencia de restos hemáticos, compatible con un implante endometriósico.
